# Supplementary material for: Examining Variance, Flexibility, and Centrality in the Spatial Configurations of Yazd Schools: A Longitudinal Analysis
Source: MDPI journal article supplement (doi:10.3390/buildings12122080), 2022-11-28
Supplement: s1 [file s1]

Table S1. JPGs of selected 20 schools.

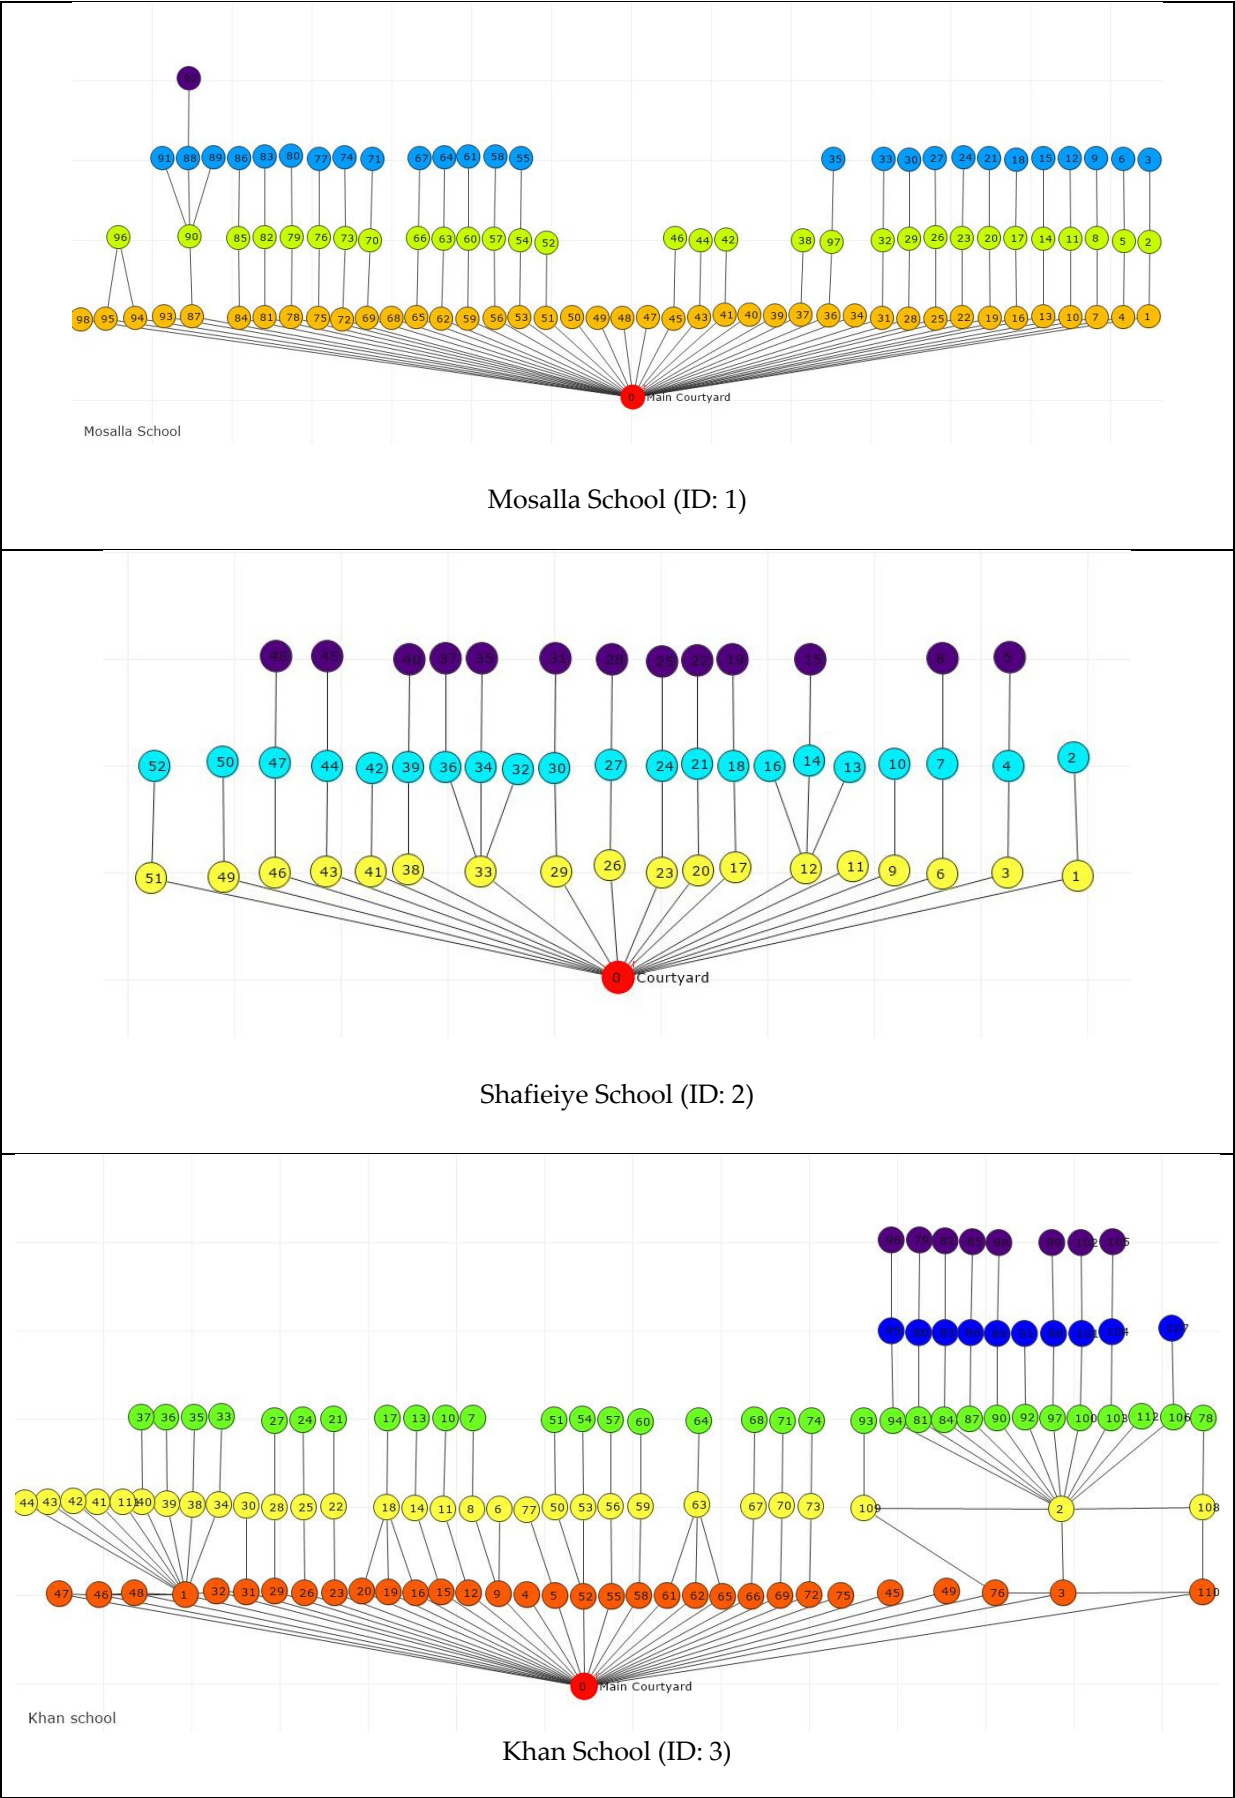

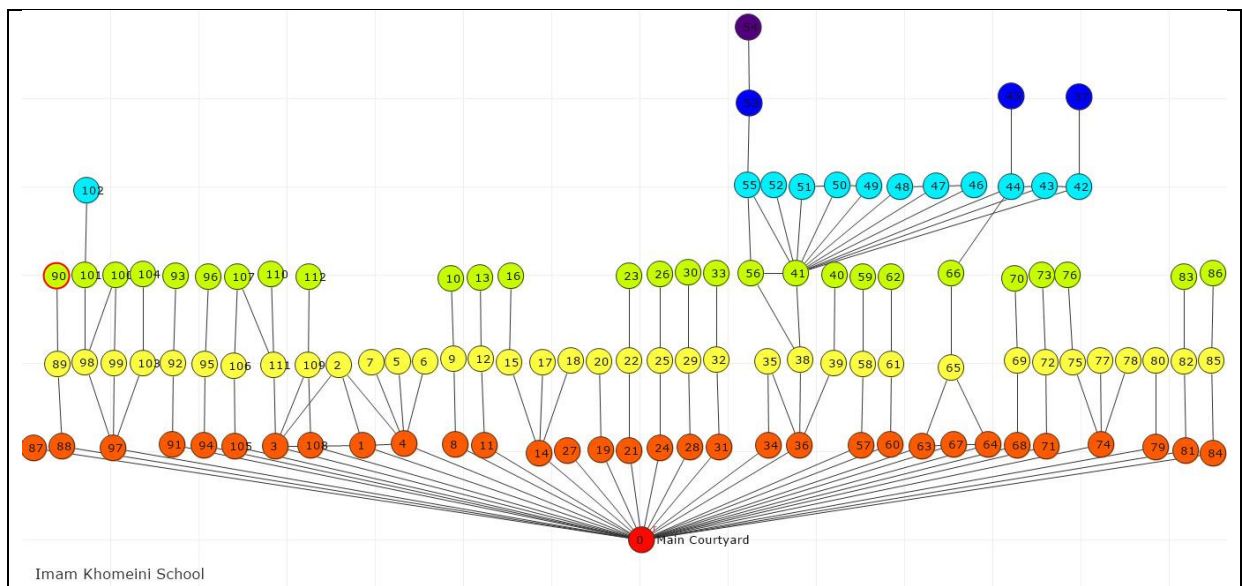

Imam Khomeini School (ID: 4)

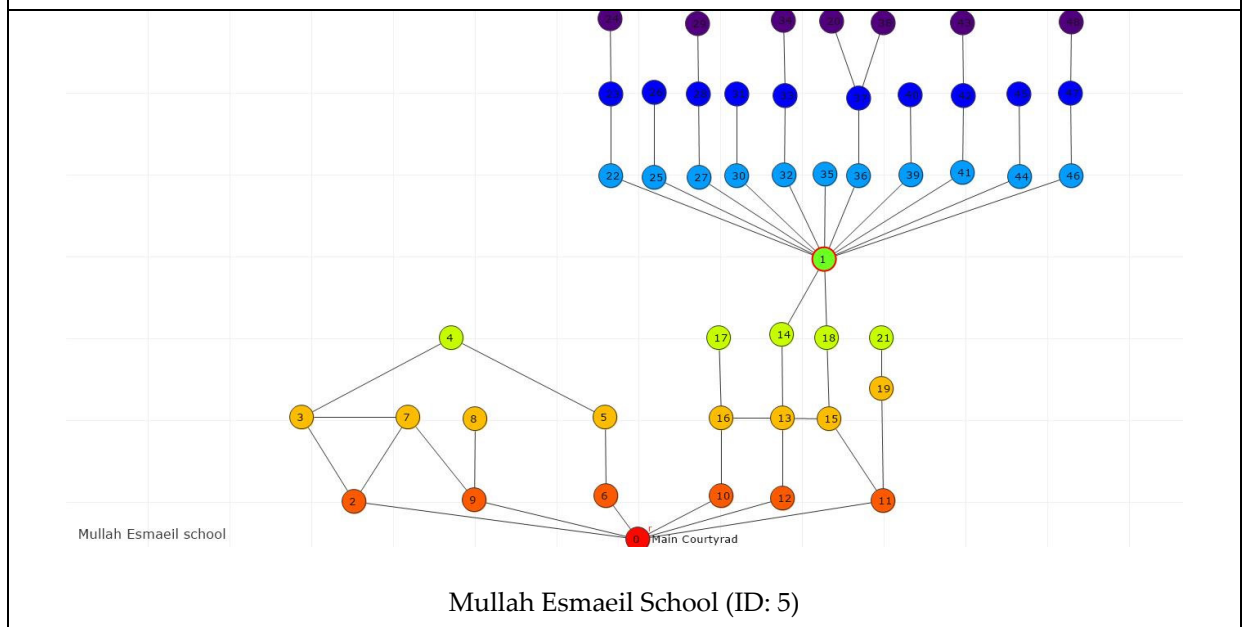

Mullah Esmaeil School (ID: 5)

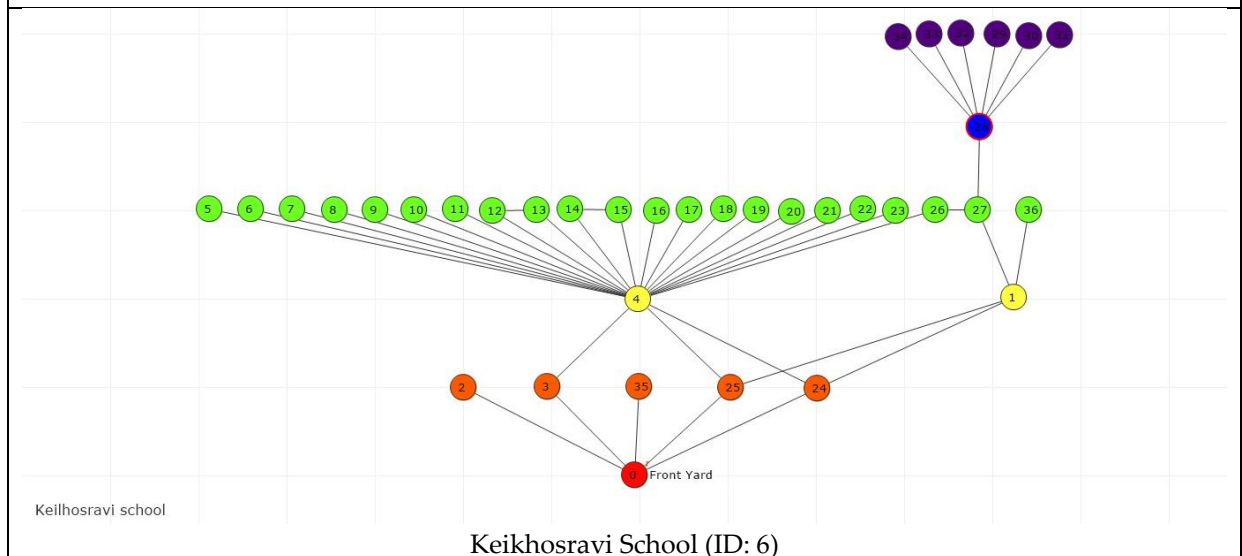

Keikhosravi School (ID: 6)

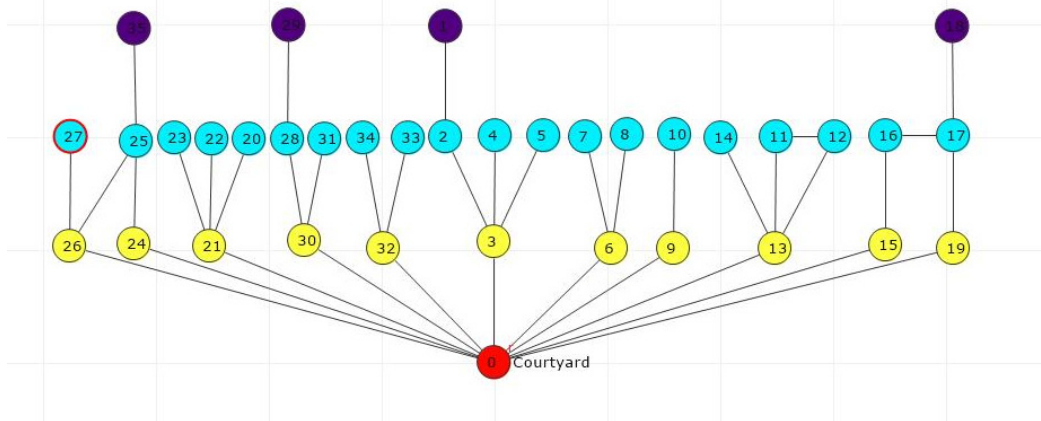

Abolmaali School (ID: 7)

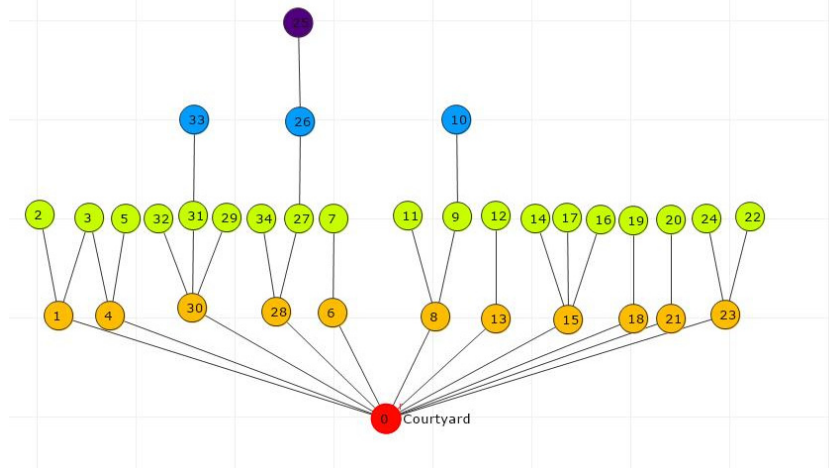

Badr School (ID: 8)

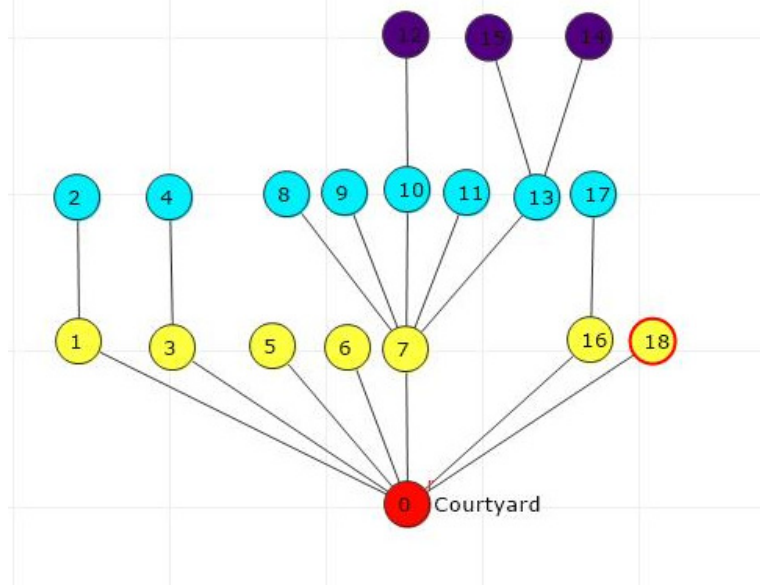

Khosravi School (ID: 9)

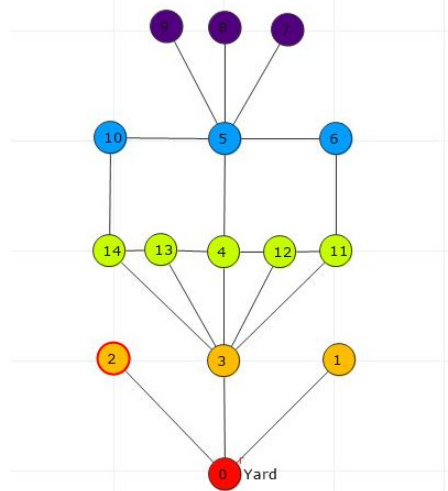

Dinyari School (ID: 10)

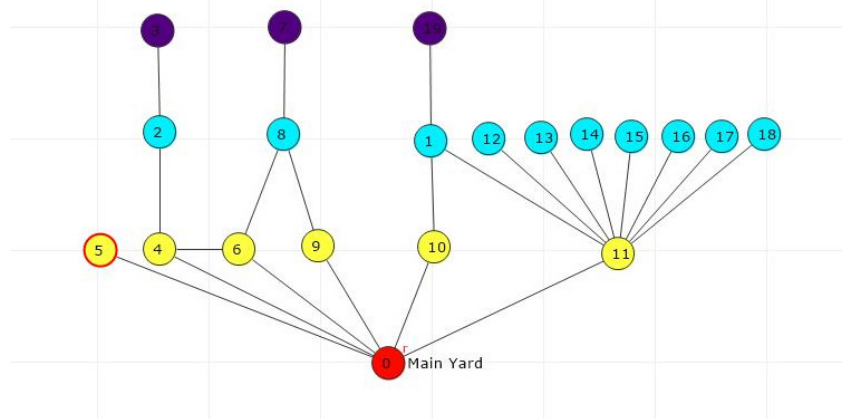

Ardeshiri School (ID: 11)

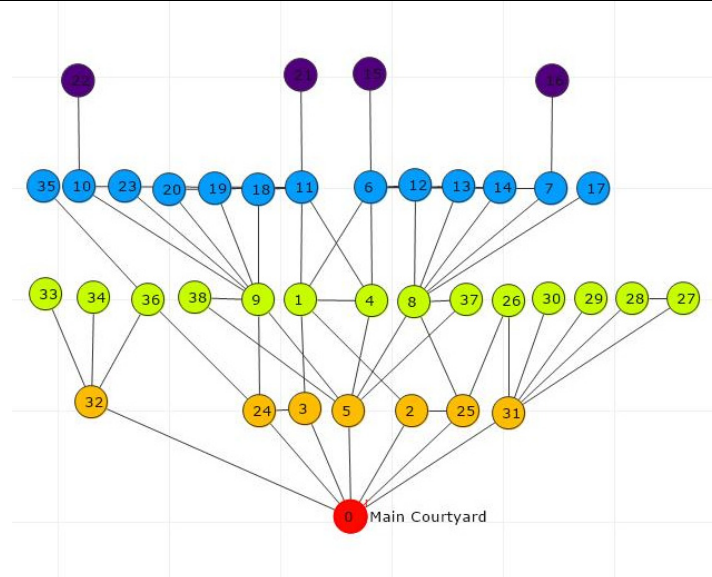

Iranshahr school (ID: 12)

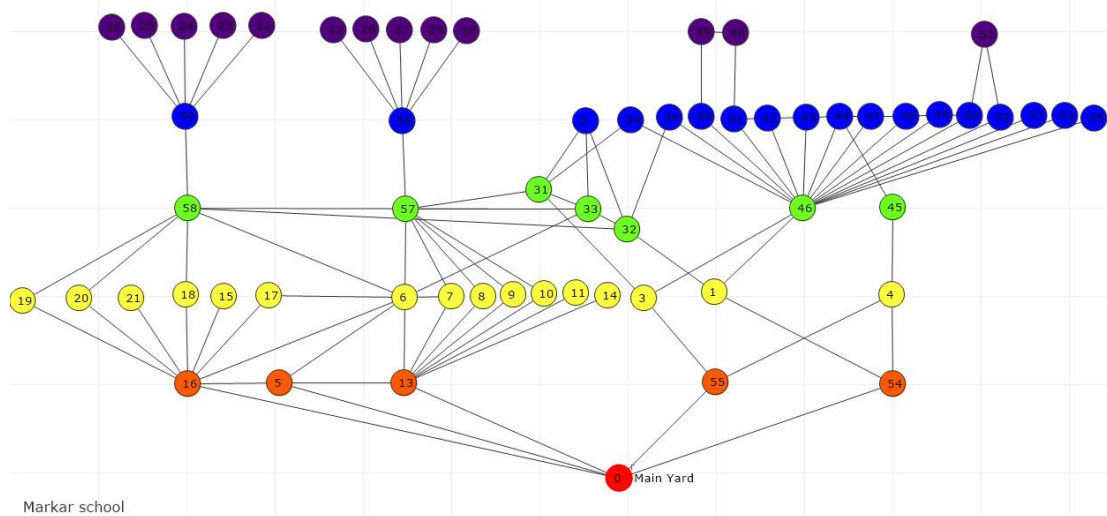

Markar School (ID: 13)

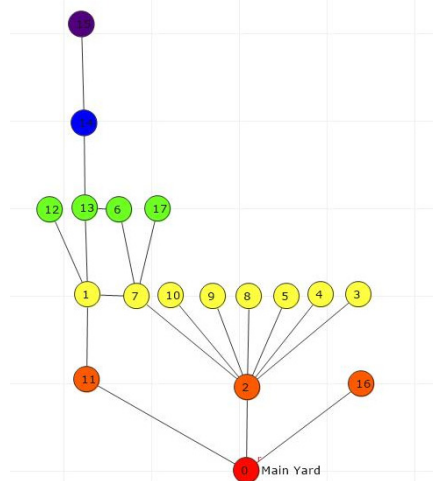

Rostami School (ID: 14)

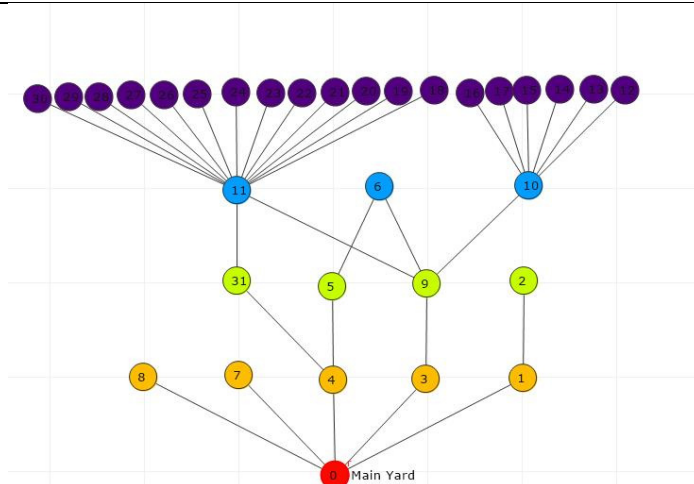

Javad-Al-Aeme 1 (ID: 15)



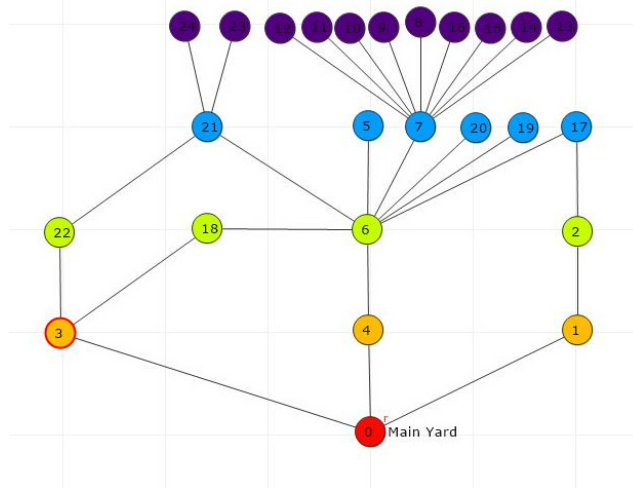

Owlia School (ID: 16)

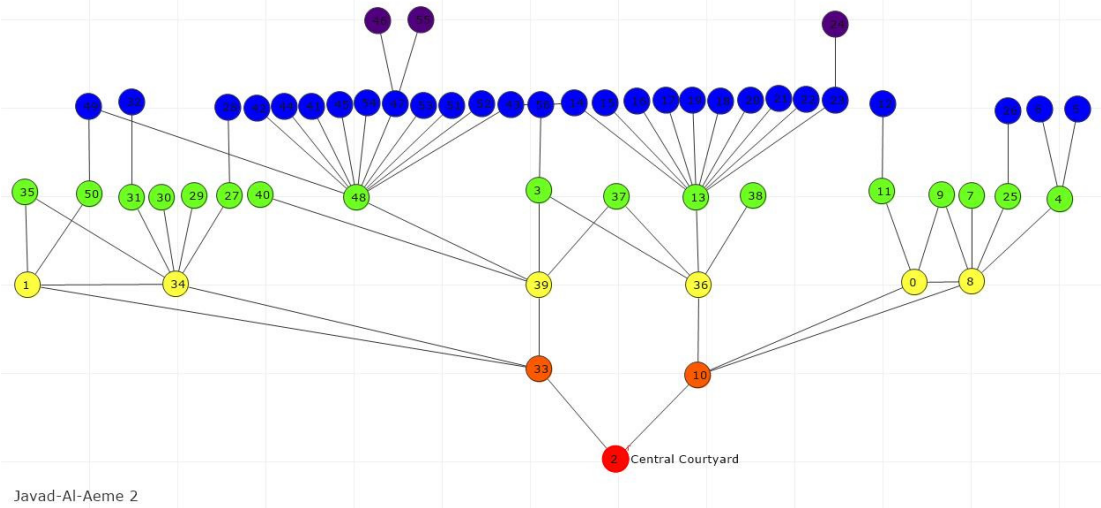

Javad-Al-Aeme 2

Javad-Al-Aeme 2 (ID: 17)

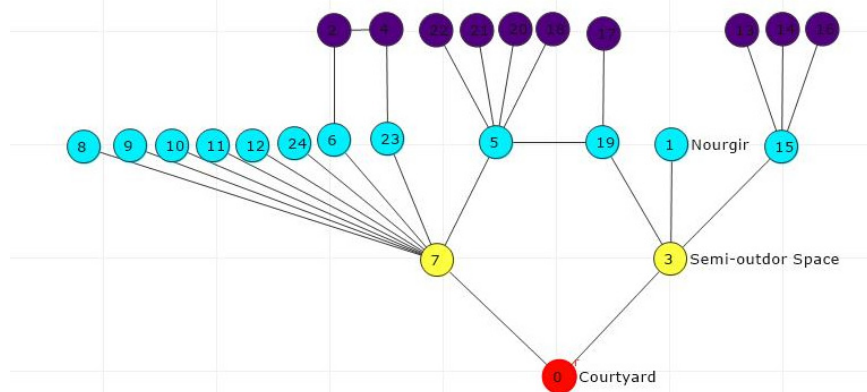

12 Day School (ID: 18)

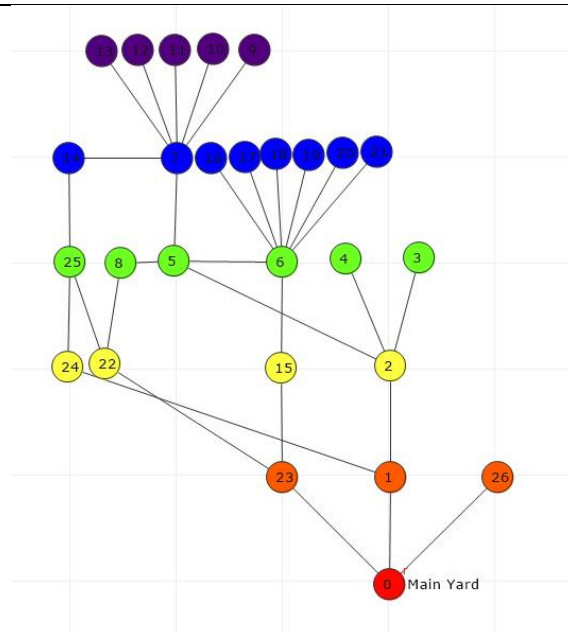

Yadegar-E-Emam School (ID: 19)

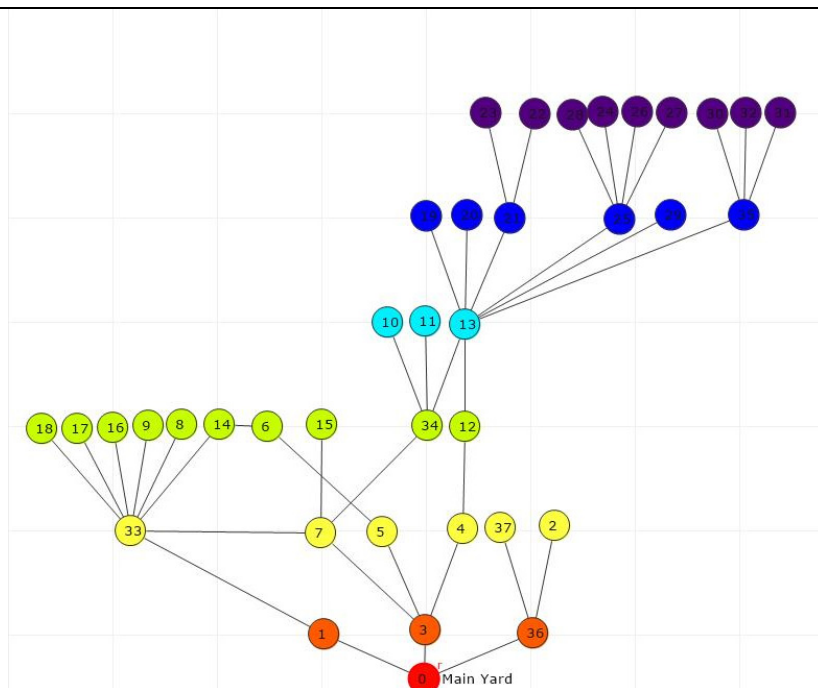

Danesh School (ID: 20)
